# Supplementary material for: Relationship between Crystalline Lens Thickness and Shape and the Identification of Anterior Ocular Segment Parameters for Predicting the Intraocular Lens Position after Cataract Surgery
Source: Biomed Res Int. 2019 Jul 8;2019:3458548. doi: 10.1155/2019/3458548 (PMC6644274; doi:10.1155/2019/3458548)
Supplement: Supplementary Materials — See S1 in the Supplementary Materials for minimum data set. [file 3458548.f1.xlsx]

## Sheet: データ選択 (2)
病棟	曜日	No.	I.D.	R/L	Age	Sex	IOL Power	Axial length	Corneal power	Predicted postoperative ACD of SRK/T formula	Predictive refraction by SRK/T for after surgery	Spherical equivalent value of postoperative refraction	Prediction error	C constant	Predictive IOL position using C constant	Anterior curvature radius	Posterior curvature radius	Lens thickness	Anterior surface depth	Equatorial surface depth	Posterior surface depth	Anterior IOL surface position	Central IOL thickness position	Posterior IOL surface position
5F	月	A1	1	R	72	F	18.5	25.28	44.5709	6.13561	-2.90785	-3.25	-0.342152	0.405357	4.58401	9.39	5.87	5.04	2.61	4.62	7.65	4.173	4.653	5.133
5F	木	A1	2	R	65	F	19.5	23.94	44.3733	5.64904	-0.579268	0	0.579268	0.388713	4.98509	10.93	6.32	4.43	3.25	4.601	7.68	4.467	4.972	5.477
5F	木	A3	3	R	78	M	21	24.04	44.06	5.62338	-1.59507	-2.25	-0.654925	0.420492	4.16134	9.85	6.24	4.88	2.25	4	7.13	3.767	4.302	4.837
5F	月	A4	4	R	74	F	19.5	25.28	43.3719	5.81282	-2.74771	-2.625	0.122707	0.360244	4.35584	9.07	6.29	4.1	2.75	4.245	6.85	3.722	4.227	4.732
5F	木	A3	5	R	64	F	25.5	21.74	45.8668	5.00626	-0.821148	-0.625	0.196148	0.429535	4.19418	9.35	5.9	4.3	2.51	4.049	6.81	3.752	4.357	4.962
5F	木	B1	6	R	68	F	20.5	23.48	44.7944	5.53122	-0.609022	-0.5	0.109022	0.471245	4.04518	11.23	6.43	4.66	2.22	4.302	6.88	3.891	4.416	4.941
5F	月	B1	7	R	74	F	19	23.56	45.9493	5.84606	-0.577618	-0.625	-0.0473823	0.418534	4.48309	9.5	6.15	4.91	2.56	4.261	7.47	4.125	4.615	5.105
6F	木	A3	8	R	67	M	16	25.75	42.9862	5.83148	-0.962244	-0.75	0.212244	0.380097	4.95368	13.65	6.71	4.12	3.34	4.446	7.46	4.466	4.906	5.346
5F	木	A5	9	R	50	F	18	25.05	43.8792	5.88191	-1.56608	-1.625	-0.0589194	0.389423	4.78934	11.44	6.72	4.16	3.16	4.527	7.32	4.31	4.78	5.25
5F	木	B1	10	R	63	M	16	25.9	44.3365	6.24331	-2.28663	-2.375	-0.0883666	0.394407	4.68076	10.49	6.38	4.47	2.93	4.441	7.4	4.253	4.693	5.133
	木	A2	11	R	62	F	24.5	23.27	41.9764	4.91483	-0.949127	-0.25	0.699127	0.345436	4.76784	9.46	5.41	4.82	2.88	4.416	7.7	3.94	4.545	5.15
	木	A5	12	R	43	M	17	25.29	42.9162	5.70495	-0.659976	-0.375	0.284976	0.315584	4.97792	13.97	6.09	3.85	3.47	4.431	7.32	4.23	4.685	5.14
	木	A1	13	R	73	M	20.5	24.02	44.6306	5.74871	-1.60861	-1.75	-0.141388	0.430023	4.21509	9.91	6.39	4.43	2.48	4.084	6.91	3.86	4.385	4.91
	月	A1	14	R	76	M	18.5	25.86	42.3098	5.69334	-2.43848	-2.375	0.0634819	0.390086	4.54734	9.73	5.62	4.64	2.73	4.44	7.37	4.06	4.54	5.02
	月	B1	15	R	67	M	20.5	24.58	43.3442	5.63102	-1.90759	-2.375	-0.467409	0.369281	4.45776	9.94	5.73	4.59	2.66	4.092	7.25	3.83	4.355	4.88
	木	A1	16	R	66	F	22	23.48	43.3804	5.24112	-0.634786	0.375	1.00979	0.376147	4.77768	9.65	5.92	4.36	3.07	4.528	7.43	4.15	4.71	5.27
	月	A3	17	R	57	F	16	25.65	42.8144	5.7656	-0.629615	-0.625	0.00461468	0.369369	4.57901	10.21	5.65	4.44	2.84	4.196	7.28	4.04	4.48	4.92
5F	月	A1	18	R	78	F	25	23.33	41.5216	4.86177	-1.11869	-1.375	-0.256311	0.304087	4.44934	11.71	4.93	4.16	2.82	3.733	6.98	3.48	4.085	4.69
5F	月	A3	19	L	86	F	18	24.62	44.0486	5.80965	-0.769156	-1.625	-0.855844	0.390041	4.63784	12.6	6.5	4.82	2.75	4.092	7.57	4.16	4.63	5.1
５F	木	B1	20	R	70	F	19	23.75	44.9899	5.70355	-0.296649	-0.125	0.171649	0.385809	4.77643	11.61	6.9	4.51	3.01	4.445	7.52	4.26	4.75	5.24
５F	月	A2	21	R	71	F	14.5	26.2	43.839	6.17542	-1.48539	-1.625	-0.139609	0.452675	4.62351	8.13	5.52	4.86	2.72	4.215	7.58	4.51	4.92	5.33
５F	月	B1	22	R	65	M	21.5	24.38	43.4731	5.60999	-2.26898	-1.75	0.51898	0.399558	4.59426	9.77	6.62	4.53	2.82	4.027	7.35	4.08	4.63	5.18
５F	月	A1	23	R	58	F	20.5	23.38	45.4567	5.63437	-0.86315	-1.5	-0.63685	0.379187	4.38718	9.58	5.96	4.18	2.75	4.233	6.93	3.81	4.335	4.86
５F	月	B1	24	R	68	M	19.5	24.21	43.3272	5.53469	-0.368484	-0.375	-0.00651589	0.401961	4.75776	10.06	6.45	4.59	2.96	4.527	7.55	4.3	4.805	5.31
５F	月	A1	25	R	85	F	23	23.3	44.4067	5.36947	-1.69468	-1.5	0.194676	0.400579	4.44884	9.15	5.6	5.18	2.42	3.964	7.6	3.92	4.495	5.07
５F	木	A1	26	R	83	F	20.5	23.38	46.34	5.85191	-1.46758	-2	-0.532418	0.412076	4.44868	9.75	5.6	4.72	2.6	4.021	7.32	4.02	4.545	5.07
5F	木	B1	27	R	76	M	17.5	25.75	43.4634	5.95434	-2.37333	-2.25	0.123331	0.343373	4.71051	10.35	6.02	4.98	2.76	4.333	7.74	4.01	4.47	4.93
5F	月	B1	28	R	74	M	15	26.25	44.4269	6.37185	-2.36736	-2.875	-0.507637	0.429561	4.40593	9.8	6.83	4.33	2.71	4.407	7.04	4.15	4.57	4.99
5F	木	B1	29	R	79	F	20.5	23.68	44.4625	5.54898	-0.792113	-0.75	0.0421129	0.415332	4.35159	10.43	6.39	4.37	2.64	4.384	7.01	3.93	4.455	4.98
5F	月	B2	30	R	55	F	20.5	24.4	42.2444	5.35311	-0.692404	-1.125	-0.432596	0.434524	4.06501	9.62	6.05	4.2	2.42	3.928	6.62	3.72	4.245	4.77
5F	木	A1	31	R	52	F	22	23.89	44.3392	5.61781	-2.19477	-2.875	-0.680234	0.385882	4.21459	10.21	5.84	4.25	2.55	3.837	6.8	3.63	4.19	4.75
5F	木	B1	32	R	74	F	21.5	24.33	41.8062	5.25189	-0.925463	-1.125	-0.199537	0.36715	4.37151	9.48	4.72	4.14	2.75	3.681	6.89	3.72	4.27	4.82
5F	月	B4	33	R	46	F	18	25.68	42.9208	5.79863	-2.1725	-2	0.1725	0.442438	4.41509	9.8	5.79	4.43	2.68	3.943	7.11	4.17	4.64	5.11
５F	月	A1	34	R	81	F	22	23.99	43.1826	5.4106	-1.57222	-1.375	0.19722	0.412998	4.43826	9.9	6.32	4.77	2.57	4.248	7.34	3.98	4.54	5.1
５F	月	B2	35	R	68	F	21.5	23.13	44.9288	5.40339	-0.637568	-1	-0.362432	0.390971	4.50509	9.77	6	4.43	2.77	4.39	7.2	3.952	4.502	5.052
5F	月	A1	36	R	80	F	21	23.4	44.4789	5.42762	-0.557283	-0.125	0.432283	0.358407	4.53034	11.48	6.18	4.52	2.76	4.105	7.28	3.845	4.38	4.915
5F	木	B1	37	R	71	F	20.5	23.95	43.6633	5.49483	-0.776103	-0.375	0.401103	0.437622	4.37926	7.73	5.62	5.13	2.37	4.317	7.5	4.09	4.615	5.14
5F	月	B1	38	R	77	F	17.5	25.54	44.5484	6.20454	-2.74019	-3.25	-0.509813	0.443992	4.39101	8.99	6.2	5.16	2.37	4.048	7.53	4.201	4.661	5.121
	月	B3	39	R	72	F	24	22.8	43.8655	5.06528	-0.894153	0	0.894153	0.360277	4.61593	10.66	5.11	4.33	2.92	4.118	7.25	3.885	4.48	5.075
			40	R	86	F	23.5	22.99	43.7107	5.11038	-0.858566	-0.125	0.733566	0.42265	4.22301	9.62	5.47	4.68	2.39	3.788	7.07	3.783	4.368	4.953
			41	R	81	F	22.5	22.5	45.7784	5.302	-0.505622	-1.375	-0.869378	0.376499	4.15326	10.34	5.79	4.17	2.52	3.735	6.69	3.52	4.09	4.66
			42	R	54	F	12	27.96	42.4424	6.17979	-1.9145	-1.625	0.289499	0.35035	5.13026	10.11	5.35	4.29	3.45	4.763	7.74	4.503	4.953	5.403
			43	R	52	F	21.5	23.31	44.457	5.38405	-0.693625	-0.75	-0.0563746	0.374545	4.64792	10.18	6.86	3.85	3.14	4.603	6.99	4.032	4.582	5.132
5F	木	B1	44	R	85	F	24	21.8	47.1589	5.26994	-0.813355	0.125	0.938355	0.370101	4.53876	8.94	5.96	4.95	2.6	4.395	7.55	3.837	4.432	5.027
5F	木	A1	45	R	67	F	21	23.68	44.084	5.46669	-0.86728	-0.375	0.49228	0.389352	4.50201	10.05	6.07	4.32	2.81	4.308	7.13	3.957	4.492	5.027
5F	月	B1	46	R	56	M	11	27.49	43.4518	6.3837	-1.23783	-1	0.237831	0.321448	4.85092	13.01	6.45	3.73	3.39	4.493	7.12	4.164	4.589	5.014
5F	月	B3	47	R	65	F	15.5	26.6	43.7018	6.23861	-2.8495	-3	-0.150501	0.421853	4.49893	7.97	5.64	4.21	2.85	4.502	7.06	4.196	4.626	5.056
5F	月	B1	48	R	74	M	16	25.68	45.4759	6.55614	-2.66015	-2.625	0.0351491	0.411043	4.56526	9.48	6.31	4.89	2.65	4.114	7.54	4.22	4.66	5.1
	木	B2	49	R	63	F	21	24.06	43.97	5.61203	-1.57161	-1.375	0.196613	0.420628	4.58684	10	6.48	4.46	2.84	4.484	7.3	4.181	4.716	5.251
	木	B3	50	R	70	F	21	24.21	44.4985	5.80865	-2.25049	-3.25	-0.999514	0.365762	4.09609	8.3	5.35	4.79	2.22	3.868	7.01	3.437	3.972	4.507
	月	B3	51	R	47	F	23	22.81	44.4554	5.17617	-0.629713	-0.75	-0.120287	0.411554	3.92618	8.33	5.58	5.02	1.96	3.738	6.98	3.451	4.026	4.601
	木	A1	52	R	85	F	25	23.76	42.7627	5.23406	-3.00519	-3.375	-0.369813	0.407231	4.33568	9.15	5.98	4.84	2.44	4.276	7.28	3.806	4.411	5.016
	木	A3	53	R	76	F	25.5	21.85	45.5173	4.98879	-0.853973	-1.375	-0.521027	0.408079	3.95384	10.06	5.86	4.58	2.16	3.656	6.74	3.424	4.029	4.634
	月	A3	54	Ｒ	71	F	18.5	25.32	44.1707	6.03291	-2.70461	-3.25	-0.545394	0.370737	4.45984	10.67	6.33	4.34	2.76	4.138	7.1	3.889	4.369	4.849
	月	A5	55	R	77	F	13	26.89	42.6161	5.99818	-0.81666	-1	-0.18334	0.356278	4.62684	11.25	6.33	4.46	2.88	4.39	7.34	4.094	4.469	4.844
	月	B1	56	Ｒ	79	M	21.5	23.21	45.088	5.47263	-0.924321	-0.375	0.549321	0.450943	4.39584	9.08	5.69	5.3	2.32	4.004	7.62	4.16	4.71	5.26
5F	月	A1	57	R	78	M	20.5	23.62	44.7281	5.58086	-0.855678	-0.375	0.480678	0.387124	4.89518	10.7	7.67	4.66	3.07	4.894	7.73	4.349	4.874	5.399
5F	月	A2	58	R	72	F	14	26.57	44.4446	6.47009	-2.32454	-2.5	-0.175461	0.392644	4.74376	9.18	5.57	4.35	3.04	4.499	7.39	4.353	4.748	5.143
5F	木	B3	59	R	66	M	16	26.28	43.7496	6.17002	-2.60637	-3.125	-0.518626	0.311979	4.68401	11.83	6.11	3.84	3.18	4.231	7.02	3.938	4.378	4.818
5F	月	A1	60	R	80	F	19	24.17	44.4706	5.78321	-0.769337	-0.625	0.144337	0.417241	4.36376	10.86	6.21	4.35	2.66	3.863	7.01	3.985	4.475	4.965
5F	月	B3	61	R	74	M	15	27.1	42.5683	6.03157	-2.56448	-2	0.564484	0.375735	5.01801	11.86	6.2	4.08	3.42	4.774	7.5	4.533	4.953	5.373
5F	月	B5	62	R	51	M	18	26.58	41.7586	5.717	-3.10414	-3.125	-0.0208618	0.307071	4.86101	11.61	6.2	3.96	3.31	4.491	7.27	4.056	4.526	4.996
5F	月	A4	63	R	73	F	19.5	24.98	44.0713	5.91304	-2.6083	-2.625	-0.0166952	0.347357	4.77818	10.34	5.31	4.54	3	4.249	7.54	4.072	4.577	5.082
5F	月	B1	64	R	77	M	20	25.9	40.9943	5.41402	-2.61094	-1.875	0.735942	0.322807	5.07601	9.74	6.06	4.56	3.29	4.906	7.85	4.247	4.762	5.277
5F	月	B1	65	R	67	M	11	27.4	45.0786	6.97555	-2.36468	-3	-0.635322	0.359569	5.03718	13.12	6.45	4.18	3.4	4.433	7.58	4.478	4.903	5.328
5F	木	B1	66	R	73	M	22.5	23.68	44.1697	5.48502	-1.99065	-1.5	0.49065	0.521296	3.86501	8	5.73	5.4	1.75	3.653	7.15	3.995	4.565	5.135
5F	月	A1	67	R	70	F	20.5	23.78	44.1916	5.53439	-0.806228	-0.875	-0.0687717	0.372979	4.68593	10.92	6.67	4.33	2.99	4.475	7.32	4.08	4.605	5.13
5F	月	A5	68	R	66	M	19	25.16	41.4964	5.36736	-0.706155	-0.375	0.331155	0.421522	4.60168	9.28	5.59	4.6	2.8	4.181	7.4	4.249	4.739	5.229
5F	木	B2	69	R	70	M	17	26.22	42.9535	5.93441	-2.58458	-2.125	0.459578	0.398925	4.90126	10.99	6.18	4.65	3.08	4.613	7.73	4.48	4.935	5.39
5F	月	B3	70	R	73	M	15.5	27.08	42.4084	5.98417	-2.75846	-3	-0.241539	0.352206	4.98801	10.03	7.29	4.08	3.39	4.909	7.47	4.397	4.827	5.257
5F	木	A3	71	R	64	F	24.5	22.65	45.3047	5.27256	-1.9312	-2.5	-0.5688	0.386752	4.18301	8.95	5.6	4.68	2.35	3.974	7.03	3.555	4.16	4.765
5F	月	B3	72	R	26	M	16.5	27.15	40.5131	5.54375	-2.0817	-2.25	-0.168301	0.362637	4.38567	12.12	6.26	3.64	2.96	4.128	6.6	3.83	4.28	4.73
5F	木	A1	73	Ｒ	74	F	22	22.44	48.3921	5.87561	-1.77179	-2.25	-0.478208	0.477944	4.12909	8.14	5.65	4.67	2.3	3.951	6.97	3.972	4.532	5.092
5F	木	A5	74	Ｒ	44	M	20.5	24.1	43.0276	5.42474	-0.619935	-1.125	-0.505065	0.375979	4.38009	11.45	4.95	3.83	2.88	3.759	6.71	3.795	4.32	4.845
5F	木	B1	75	Ｒ	72	F	18	24.68	43.7416	5.7501	-0.674368	-0.875	-0.200632	0.376329	4.68151	12.7	5.1	4.14	3.06	4.005	7.2	4.148	4.618	5.088
5F	月	A1	76	Ｒ	66	F	21.5	24.08	42.1848	5.24877	-0.666302	0	0.666302	0.3902	4.85859	9.32	6.28	4.49	3.1	4.839	7.59	4.302	4.852	5.402
5F	月	A3	77	R	69	F	22	23.7	44.8297	5.64167	-2.14155	-2.125	0.0165471	0.411166	4.42843	9.74	5.46	4.03	2.85	3.787	6.88	3.947	4.507	5.067
5Ｆ	木	A1	78	R	69	F	21.5	23.88	42.9827	5.32469	-0.83886	-0.375	0.46386	0.492259	4.18218	8.84	5.68	4.78	2.31	3.842	7.09	4.113	4.663	5.213
	月	B3	79	R	64	M	10	28.47	43.7274	6.72225	-2.49995	-2.375	0.12495	0.348585	5.46068	12.36	5.77	4.24	3.8	4.781	8.04	4.868	5.278	5.688
